# Supplementary material for: Enantioselective absorption of enantiomers with maleic anhydride-β-cyclodextrin modified magnetic microspheres
Source: Royal Society of Chemistry journal article supplement (doi:10.1039/c4ra12133c), 2014-10-27

## Supporting Information

### Enantioselective Absorption of Enantiomers with Maleic Anhydride- $\beta$ - Cyclodextrin Modified Magnetic Microspheres

Jun Huang, Ping Su, Jingwei Wu, Yi Yang\*

College of Science & Beijing Key Laboratory of Environmentally Harmful Chemical  
Analysis, Beijing University of Chemical Technology, Beijing 100029, P. R. China.

\***Author for correspondence:** e-mail: yangyi@mail.buct.edu.cn

Fax: +86-10-64434898

Phone: +86-10-64454599

## Synthesis of the $\beta$ -CD monomer (MAH- $\beta$ -CD)

The MAH- $\beta$ -CD monomer, which can be copolymerized with other compounds containing a double bond, was completed by nucleophilic attack on the alcohol group in a dimethylformamide (DMF) solution. Typically, 0.005 mol of  $\beta$ -CD and 0.05 mol of MAH were dissolved in 30 mL of dried DMF under adequate ultrasonication, and the transparent mixture solution was subsequently placed in an 80°C oil bath for 10 h under vigorous stirring. After the reaction was completed and the mixture cooled, a yellow mixture solution was obtained. At this point, a white precipitate was immediately filtrated with the addition of 30 mL of trichloromethane, and washed with 100 mL of acetone four times. The final product was dried in a vacuum oven until a constant weight was maintained.

The elemental analytical result of the MAH- $\beta$ -CD monomer is C: 45.68%; H: 5.19%, which indicate that the molecular structure of MAH- $\beta$ -CD is agreement with the theoretic calculation of  $C_{62}H_{80}O_{50}$ . The degree of substitution is five.  $^{13}C$ -NMR (400MHz,  $D_2O$  as the solvent, Fig. S-1)  $\delta$  (ppm): 169 (C-10), 166 (C-7), 132 (C-8), 127 (C-9).

## References

Y.Y. Liu, X.D. Fan. *Polymer* 2002, **43**,4997-5003.

**Fig. S-1:  $^{13}\text{C}$ -NMR spectrum of MAH- $\beta$ -CD monomer**

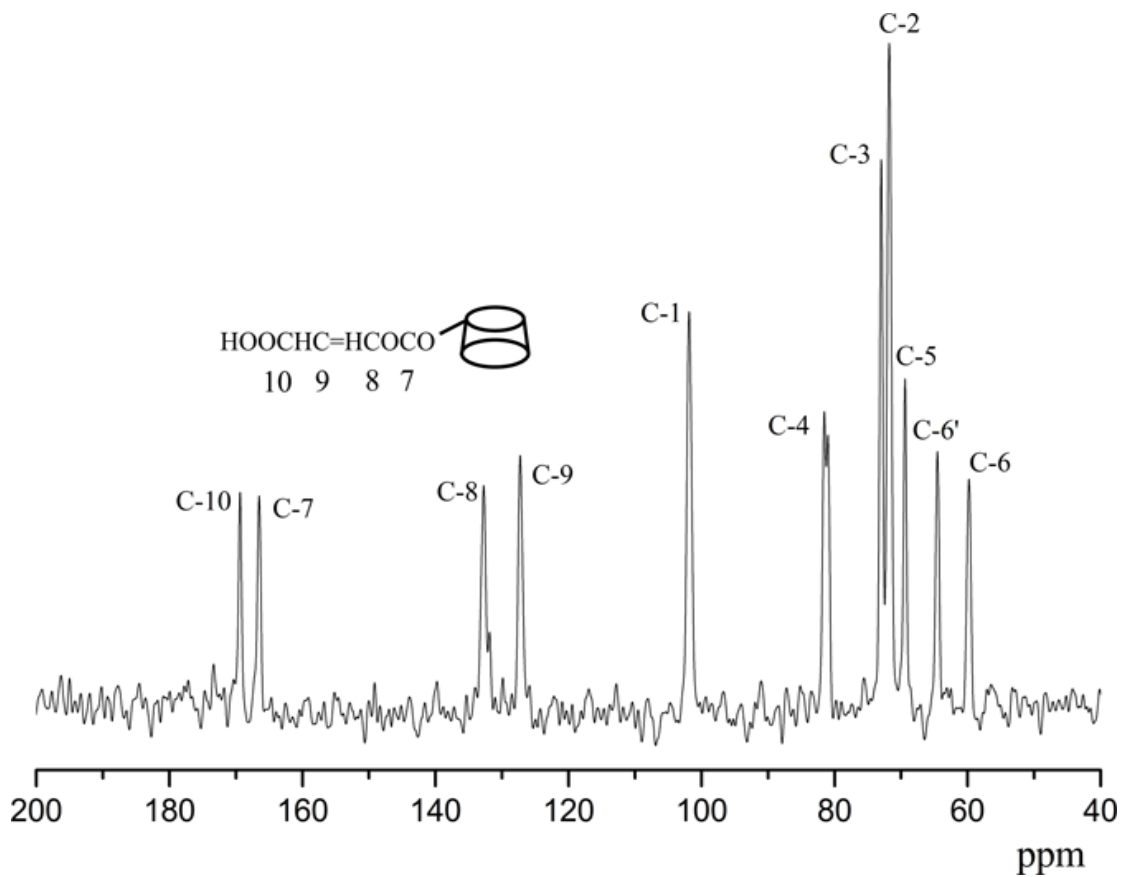

Supplement: c4ra12133c1.pdf [file c4ra12133c1.pdf]
